# Supplementary material
Source: PubMed Central journal article supplement (PMC4134726)

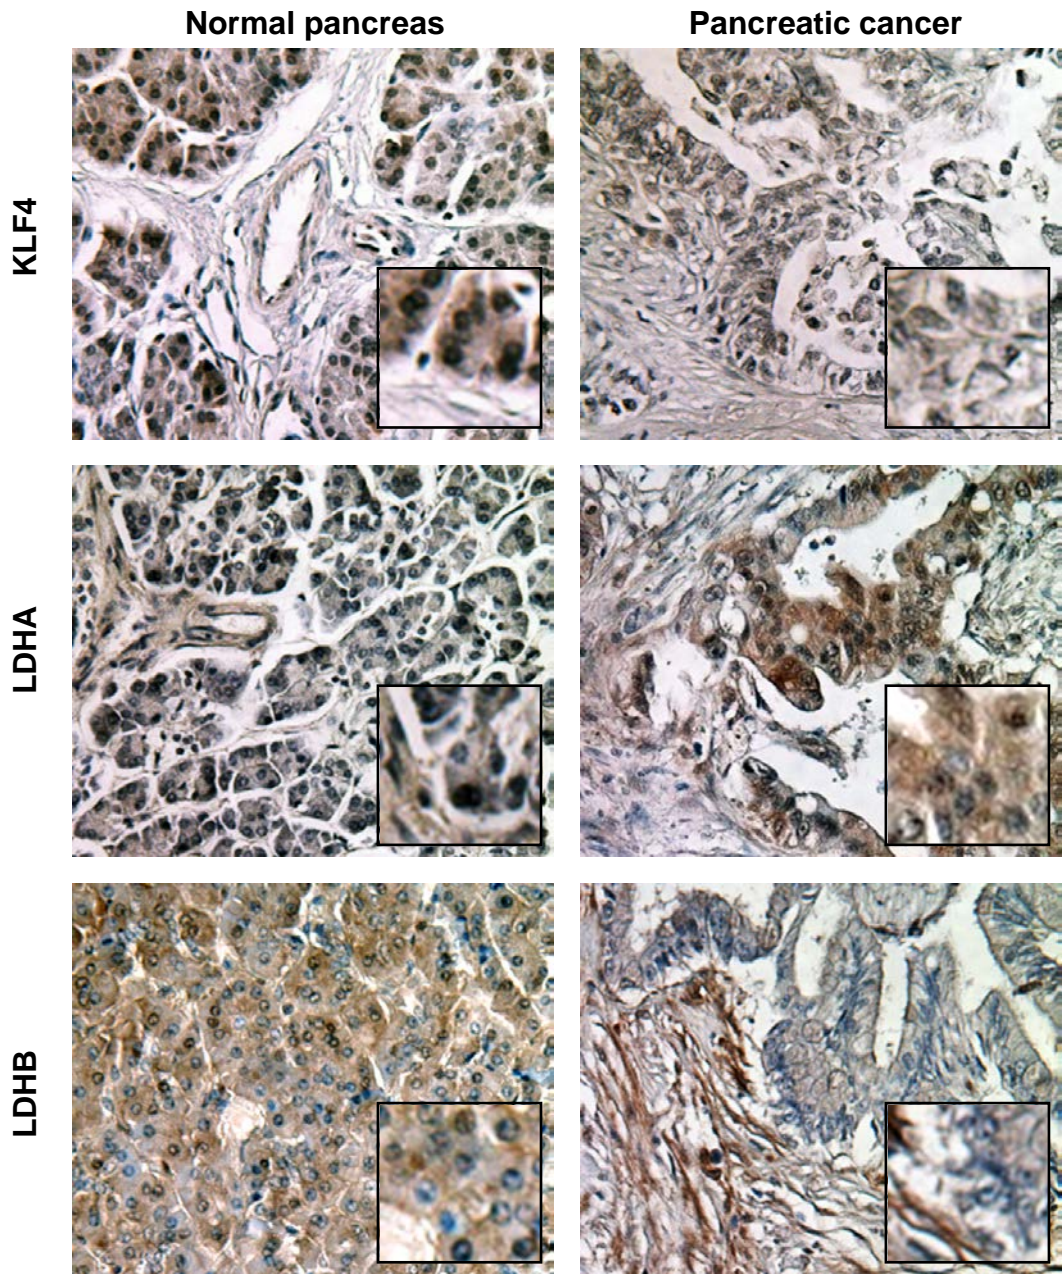

A

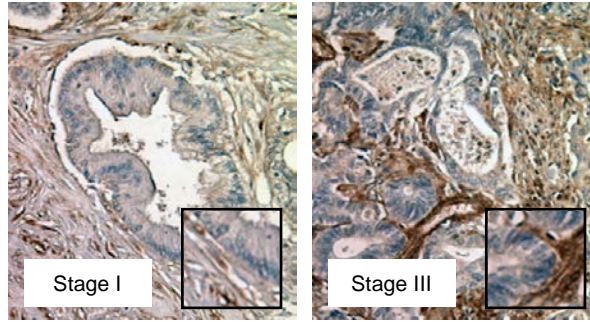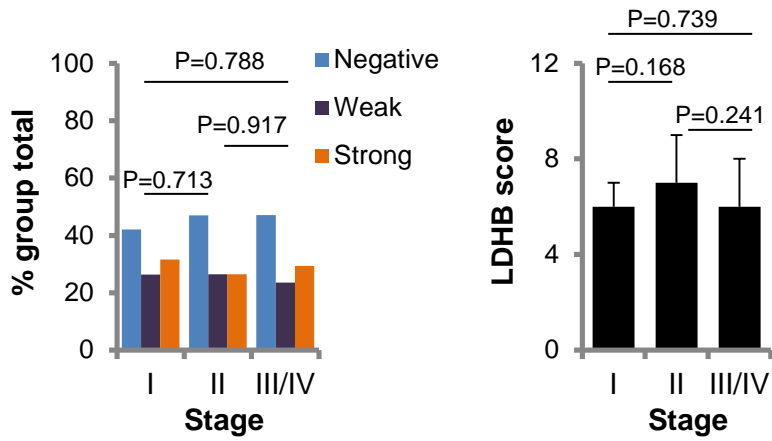

B

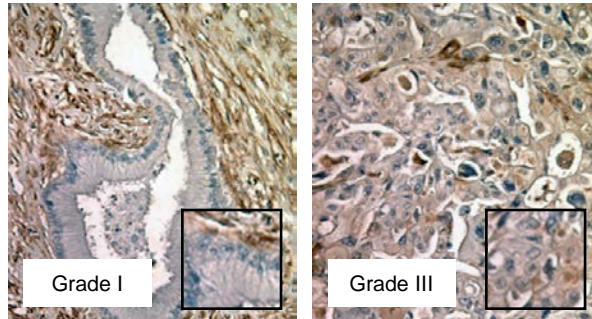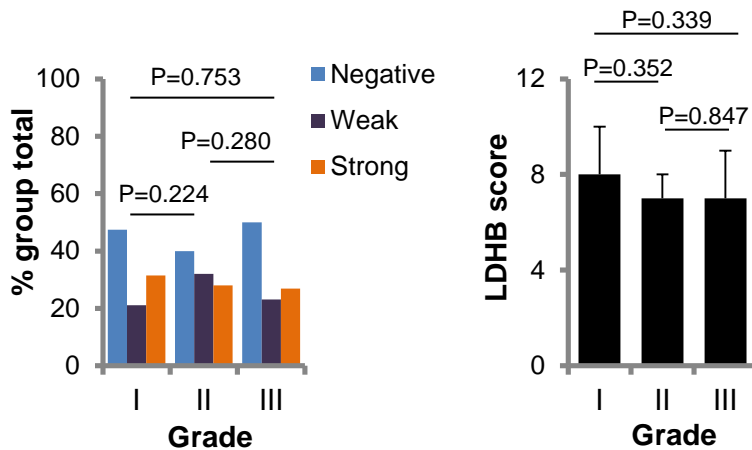

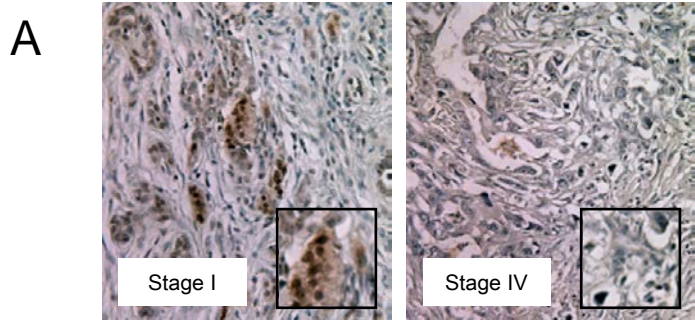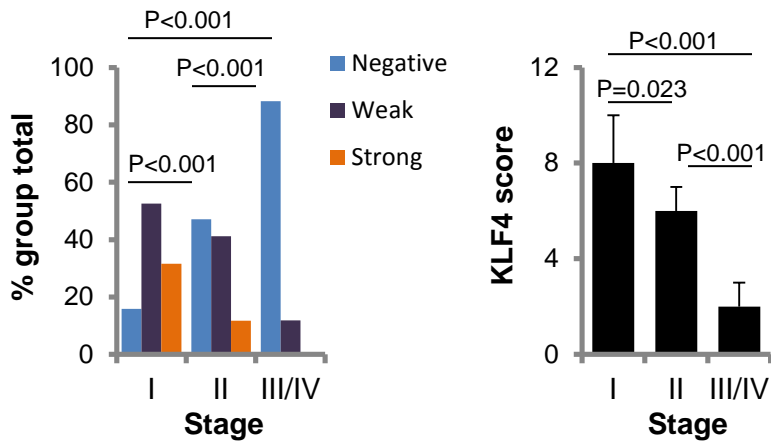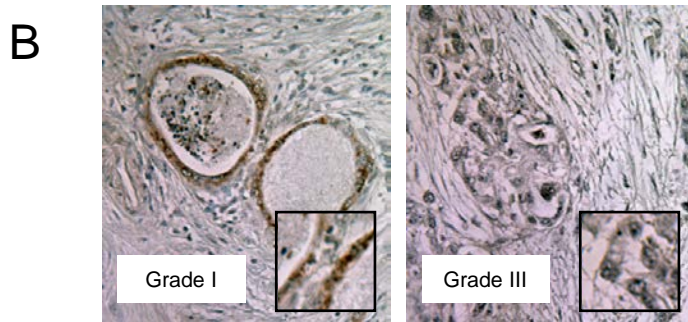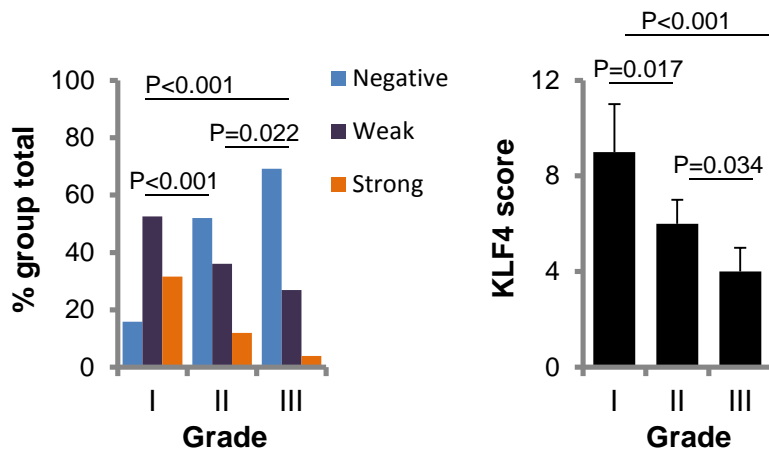

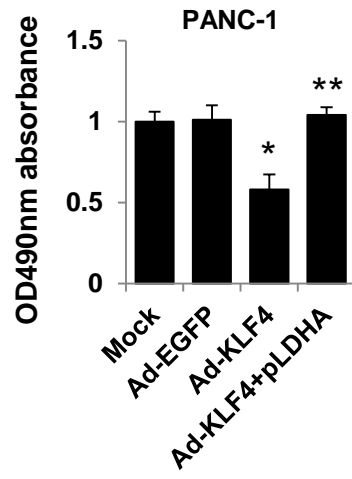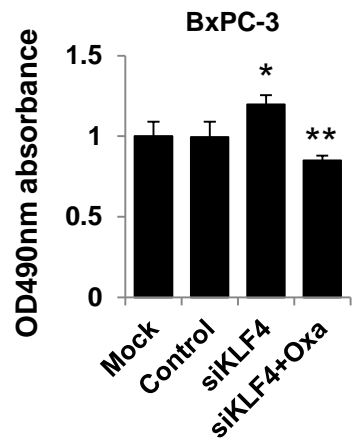

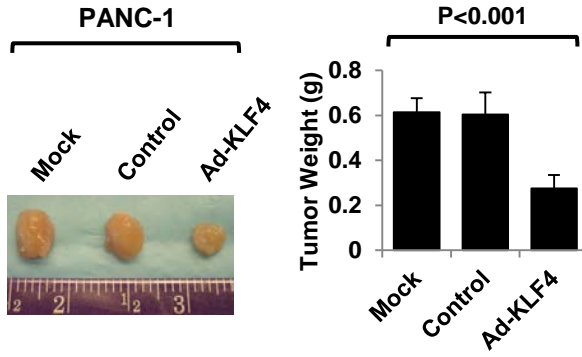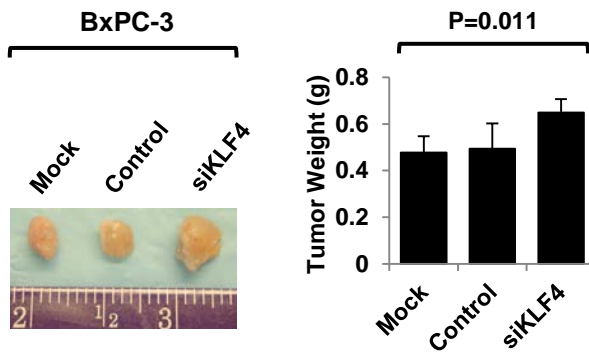

Supplement: NIHMS606337-supplement-2.pdf [file NIHMS606337-supplement-2.pdf]
